# Supplementary material for: Genome-wide polygenic risk impact on intracranial aneurysms and acute ischemic stroke
Source: PubMed Central journal article supplement (PMC9012378; doi:10.1371/journal.pone.0265581), 2022-04-15
Supplement: pone.0265581.s001.pdf [file pone.0265581.s001.pdf]

**S1 Table.** Weighted polygenic risk scores from the genome-wide association study

| Gene                       | Chr      | SNP         | NR <sup>a</sup> R <sup>a</sup> | ln(OR) <sup>b</sup> | OR <sup>b</sup> | P <sup>b</sup>         |
|----------------------------|----------|-------------|--------------------------------|---------------------|-----------------|------------------------|
| GWA $p < 5 \times 10^{-8}$ |          |             |                                |                     |                 |                        |
| <i>PRDM2</i>               | 1p36.21  | rs61775135  | A C                            | 1.153597            | 0.3155          | $3.59 \times 10^{13}$  |
| <i>GBA</i>                 | 1q22     | rs75822236  | C T                            | 5.083886            | 161.4           | $1.09 \times 10^{-19}$ |
| <i>FMO4</i>                | 1q24.3   | rs3737926   | T C                            | 1.014731            | 0.3625          | $1.83 \times 10^{-10}$ |
| <i>RNF144A</i>             | 2p25.1   | rs6741819   | T C                            | 1.382302            | 0.251           | $4.05 \times 10^{-14}$ |
| <i>FLJ45964</i>            | 2q37.3   | rs59626274  | T C                            | 1.342852            | 0.2611          | $5.78 \times 10^{-14}$ |
| <i>LINC01237</i>           | 2q37.3   | rs78458145  | A G                            | 1.407722            | 0.2447          | $3.14 \times 10^{-15}$ |
| <i>SPCS3</i>               | 4q34.2   | rs17688188  | A G                            | 1.312301            | 0.2692          | $5.99 \times 10^{-13}$ |
| <i>TCF24</i>               | 8q13.1   | rs112859779 | T C                            | 1.686319            | 0.1852          | $3.33 \times 10^{-16}$ |
| <i>C9orf92</i>             | 9p22.3   | rs12350582  | A G                            | 0.888714            | 2.432           | $1.49 \times 10^{-8}$  |
| <i>LINGO2</i>              | 9p21.1   | rs56942085  | G A                            | 1.809108            | 6.105           | $3.90 \times 10^{-8}$  |
| <i>TMOD1</i>               | 9q22.33  | rs1052270   | T C                            | 0.893063            | 0.4094          | $2.71 \times 10^{-8}$  |
| <i>SUSD1</i>               | 9q31.3   | rs79461840  | T C                            | 1.933693            | 6.915           | $1.40 \times 10^{-8}$  |
| <i>LINC00474</i>           | 9q33.1   | rs4979583   | C T                            | 0.896496            | 2.451           | $4.61 \times 10^{-9}$  |
| <i>OLFML2A</i>             | 9q33.3   | rs79134766  | A G                            | 1.972562            | 0.1391          | $1.70 \times 10^{-19}$ |
| <i>MYEOV</i>               | 11q13.3  | rs76855873  | T C                            | 1.107451            | 0.3304          | $1.23 \times 10^{-11}$ |
| <i>ARHGAP32</i>            | 11q24.3  | rs371331393 | G A                            | 3.774369            | 43.57           | $9.32 \times 10^{-27}$ |
| <i>CD163L1</i>             | 12p13.31 | rs138525217 | C T                            | 4.33047             | 75.98           | $6.20 \times 10^{-23}$ |
| <i>SLC2A14</i>             | 12p13.31 | rs118107419 | A C                            | 1.395537            | 0.2477          | $1.44 \times 10^{-14}$ |
| <i>DRAM1</i>               | 12q23.2  | rs7964241   | A G                            | 0.910675            | 2.486           | $1.95 \times 10^{-8}$  |
| <i>CUL4A</i>               | 13q34    | rs74115822  | G A                            | 1.831781            | 6.245           | $1.12 \times 10^{-10}$ |
| <i>LINC02130</i>           | 16p13.12 | rs11646803  | T C                            | 0.790319            | 0.4537          | $4.76 \times 10^{-10}$ |

|                          |          |             |   |   |          |        |                        |
|--------------------------|----------|-------------|---|---|----------|--------|------------------------|
| <i>LOC102724084</i>      | 16q23.2  | rs75861150  | C | T | 1.934476 | 0.1445 | 1.27×10 <sup>-8</sup>  |
| <i>SCARF1</i>            | 17p13.3  | rs3744644   | C | G | 0.943405 | 0.3893 | 6.02×10 <sup>-9</sup>  |
| <i>MINK1</i>             | 17p13.2  | rs72835045  | A | G | 1.382701 | 0.2509 | 1.69×10 <sup>-12</sup> |
| <i>SLC47A1</i>           | 17p11.2  | rs2440154   | G | A | 0.981704 | 2.669  | 1.42×10 <sup>-8</sup>  |
| <i>NAPA-ASI</i>          | 19q13.32 | rs55800589  | C | G | 0.963644 | 0.3815 | 3.35×10 <sup>-13</sup> |
| <i>DSCAM</i>             | 21q22.2  | rs727333    | A | C | 1.364533 | 0.2555 | 3.69×10 <sup>-14</sup> |
| <i>LRRC3</i>             | 21q22.3  | rs116969723 | A | G | 1.447744 | 0.2351 | 3.83×10 <sup>-15</sup> |
| <i>SLC5A4-ASI</i>        | 22q12.3  | rs117398778 | T | C | 1.318818 | 3.739  | 2.00×10 <sup>-9</sup>  |
| Reported <i>p</i> < 0.05 |          |             |   |   |          |        |                        |
| <i>BOLL</i>              | 2q33.1   | rs700651    | A | G | 0.34713  | 1.415  | 0.00789                |
| <i>EDNRA</i>             | 4q31.22  | rs6841581   | A | G | 0.630548 | 0.5323 | 0.00065                |

OR, odds ratio; SNP, single-nucleotide polymorphism.

<sup>a</sup>Non-risk (NR) and risk (R) allele were described.

<sup>b</sup>The values that indicates beta coefficient were computed by the natural log transformed OR (i.e., ln(OR)).

<sup>c</sup>OR and *p*-value were estimated by the multivariate logistic regression model after adjusting for age, gender, hypertension, diabetes, hyperlipidemia, smoking status, and four genetic ancestry values.
