# Supplementary material for: Genome-wide polygenic risk impact on intracranial aneurysms and acute ischemic stroke
Source: PubMed Central journal article supplement (PMC9012378; doi:10.1371/journal.pone.0265581), 2022-04-15
Supplement: pone.0265581.s002.pdf [file pone.0265581.s002.pdf]

**S2 Table.** Application of weighted polygenic risk scores according to subtypes of acute ischemic stroke (AIS)

| Model <sup>a</sup> | Case, N (%) | Control, N (%) | OR (95% CI) <sup>b</sup> | <i>P</i> <sup>b</sup> | Sens. <sup>c</sup> | Spec. <sup>c</sup> | AUROC (95% CI) <sup>c</sup> |
|--------------------|-------------|----------------|--------------------------|-----------------------|--------------------|--------------------|-----------------------------|
| <i>CE</i>          | N=50        | N=296          |                          |                       |                    |                    |                             |
| T1: 0.290-0.712    | 9 (18.0)    | 213 (72.0)     | Reference                |                       |                    |                    |                             |
| T2: 0.712-0.789    | 27 (54.0)   | 72 (24.3)      | 11.13 (3.99-31.03)       | 4.1×10 <sup>-6</sup>  | 0.82               | 0.72               |                             |
| T3: 0.789-1.126    | 14 (28.0)   | 11 (3.7)       | 83.01 (17.32-397.76)     | 3.2×10 <sup>-8</sup>  | 0.28               | 0.963              | 0.794 (0.730-0.857)         |
| <i>LAA</i>         | N=72        |                |                          |                       |                    |                    |                             |
| T1: 0.290-0.712    | 13 (18.1)   |                | Reference                |                       |                    |                    |                             |
| T2: 0.712-0.789    | 38 (52.8)   |                | 9.45 (4.31-20.71)        | 2.0×10 <sup>-8</sup>  | 0.819              | 0.72               |                             |
| T3: 0.789-1.126    | 21 (29.2)   |                | 42.67 (14.25-127.78)     | 2.0×10 <sup>-11</sup> | 0.292              | 0.963              | 0.795 (0.741-0.850)         |
| <i>CE</i>          | N=50        |                |                          |                       |                    |                    |                             |
| T1: 0.290-0.712    | 9 (18.0)    |                | Reference                |                       |                    |                    |                             |
| T2: 0.712-0.789    | 27 (54.0)   |                | 11.13 (3.99-31.03)       | 4.1×10 <sup>-6</sup>  | 0.82               | 0.72               |                             |
| T3: 0.789-1.126    | 14 (28.0)   |                | 83.01 (17.32-397.76)     | 3.2×10 <sup>-8</sup>  | 0.28               | 0.963              | 0.794 (0.730-0.857)         |
| <i>SVO</i>         | N=75        |                |                          |                       |                    |                    |                             |
| T1: 0.290-0.712    | 12 (16.0)   |                | Reference                |                       |                    |                    |                             |
| T2: 0.712-0.789    | 41 (54.7)   |                | 11.52 (5.03-26.4)        | 7.6×10 <sup>-9</sup>  | 0.84               | 0.72               |                             |
| T3: 0.789-1.126    | 22 (29.3)   |                | 38.83 (12.30-122.51)     | 4.3×10 <sup>-10</sup> | 0.293              | 0.963              | 0.805 (0.754-0.857)         |
| <i>UD</i>          | N=25        |                |                          |                       |                    |                    |                             |

|                 |           |                     |                      |       |       |                     |
|-----------------|-----------|---------------------|----------------------|-------|-------|---------------------|
| T1: 0.290-0.712 | 2 (8.0)   | Reference           |                      |       |       |                     |
| T2: 0.712-0.789 | 17 (68.0) | 35.05 (6.70-183.33) | $2.5 \times 10^{-5}$ | 0.838 | 0.72  |                     |
| T3: 0.789-1.126 | 6 (24.0)  | 63.94 (9.58-426.72) | $1.8 \times 10^{-5}$ | 0.284 | 0.963 | 0.836 (0.771-0.902) |

---

AUROC, area under the receive operating characteristic curve; CI, confidence interval; OR, odds ratio; Sens., sensitivity; Spec., specificity.

a Weighted polygenic risk model stratified tertile such as lowest risk, middle risk, and highest risk according to subtypes of 222 AIS patients (CE, cardioembolism; LAA, large artery atherosclerosis; SVO, small-vessel occlusion; UD, undetermined) and 296 shared controls.

<sup>b</sup> OR, 95% CI, and *p*-value were estimated by the multivariate logistic regression analyses after adjusting for age, gender, hypertension, diabetes, hyperlipidemia, smoking status, and four principal component values.

<sup>c</sup> Sensitivity, specificity, and AUROC (95% CI) were estimated by “*roctab*” package of STATA software.z
